# Supplementary material for: Downregulation of miR122 by grainyhead-like 2 restricts the hepatocytic differentiation potential of adult liver progenitor cells
Source: Oxford University Press journal article supplement (doi:10.1242/dev.113654), 2014-11-18
Supplement: dev113654supp.pdf [file dev113654supp.pdf]

Fig. S1

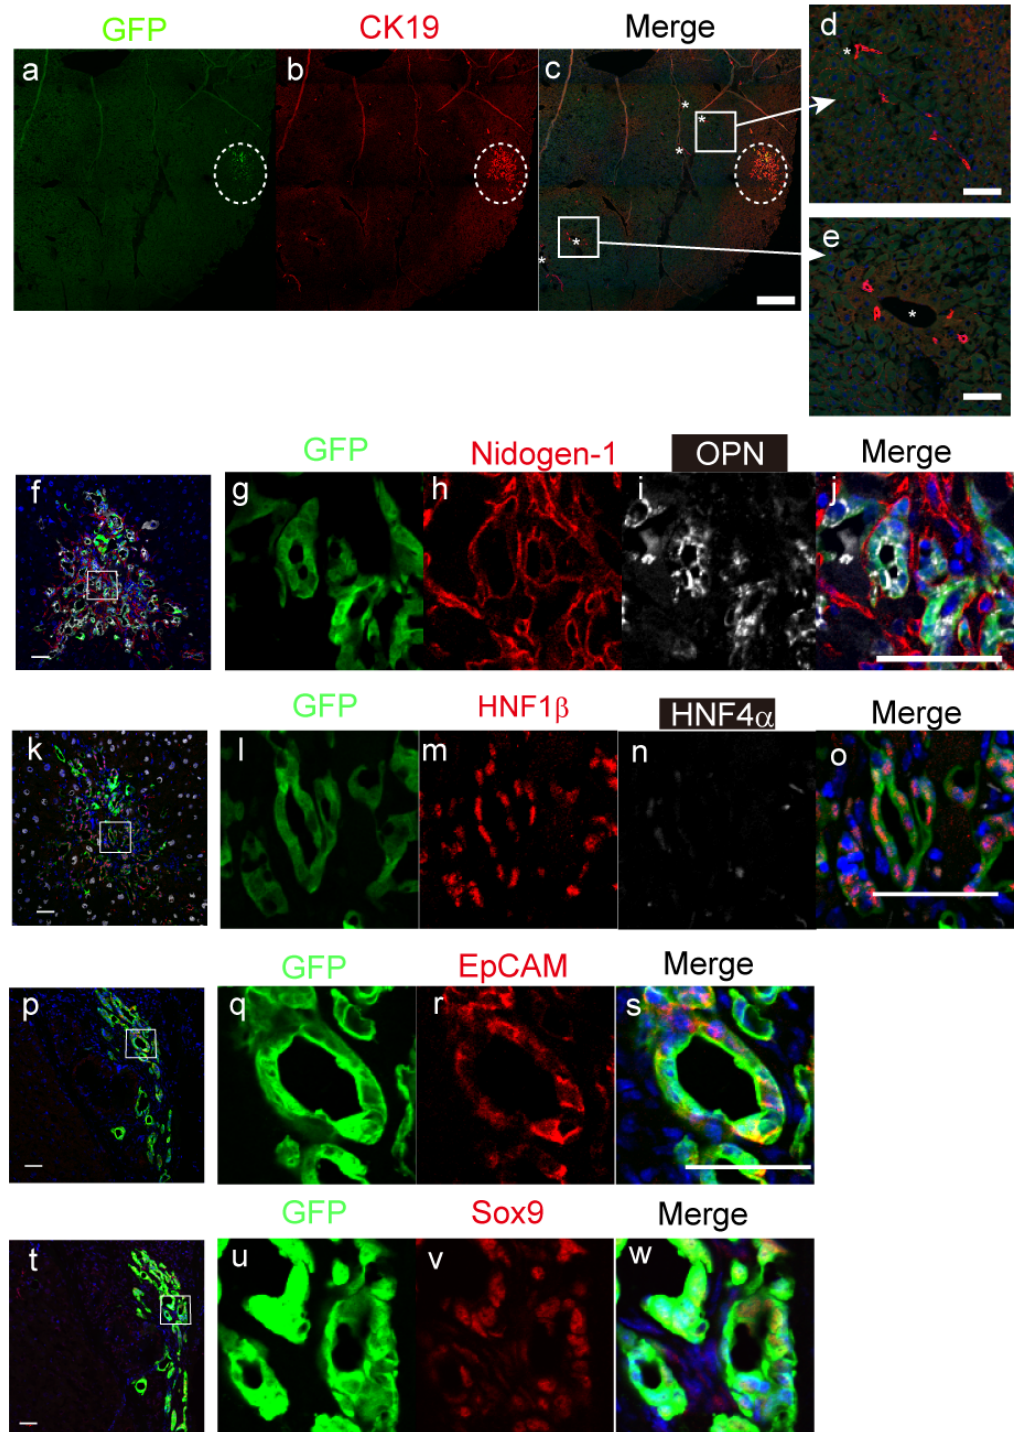

**Fig. S1. Adult clone 1 differentiates to cholangiocyte-like cells and forms ductular structures in the recipient liver.** GFP<sup>+</sup> donor cells form ductular structures, surrounded by dotted circles, apart from portal veins (asterisks). Boxes in panel c are enlarged in panels d and e. Bars in panel c and d&e represent 500 and 100 μm, respectively. GFP<sup>+</sup> donor cells express cholangiocyte markers including OPN, HNF1β, EpCAM and Sox9 but not a hepatocyte marker HNF4α. GFP<sup>+</sup> ductular structures are associated with the ECM layer recognized with Nidogen-1. Bars in panels a, f, p, and t represent 100 μm. Bars in panels e, j, o, and s represent 50 μm.

Fig. S2

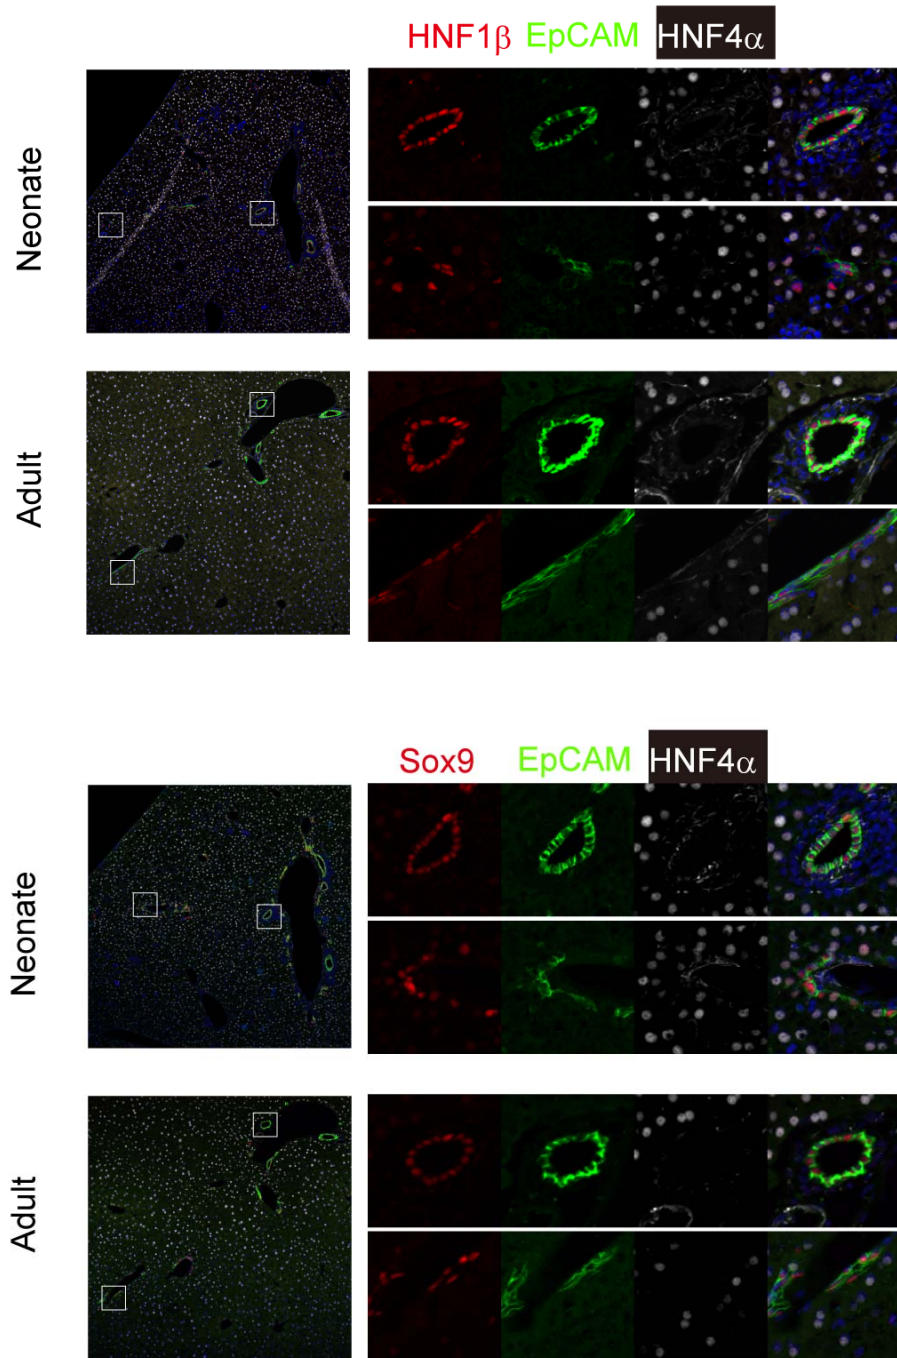

**Fig. S2. Neonatal and adult EpCAM<sup>+</sup> cells are positive for HNF1β and Sox9.**

Fig. S3

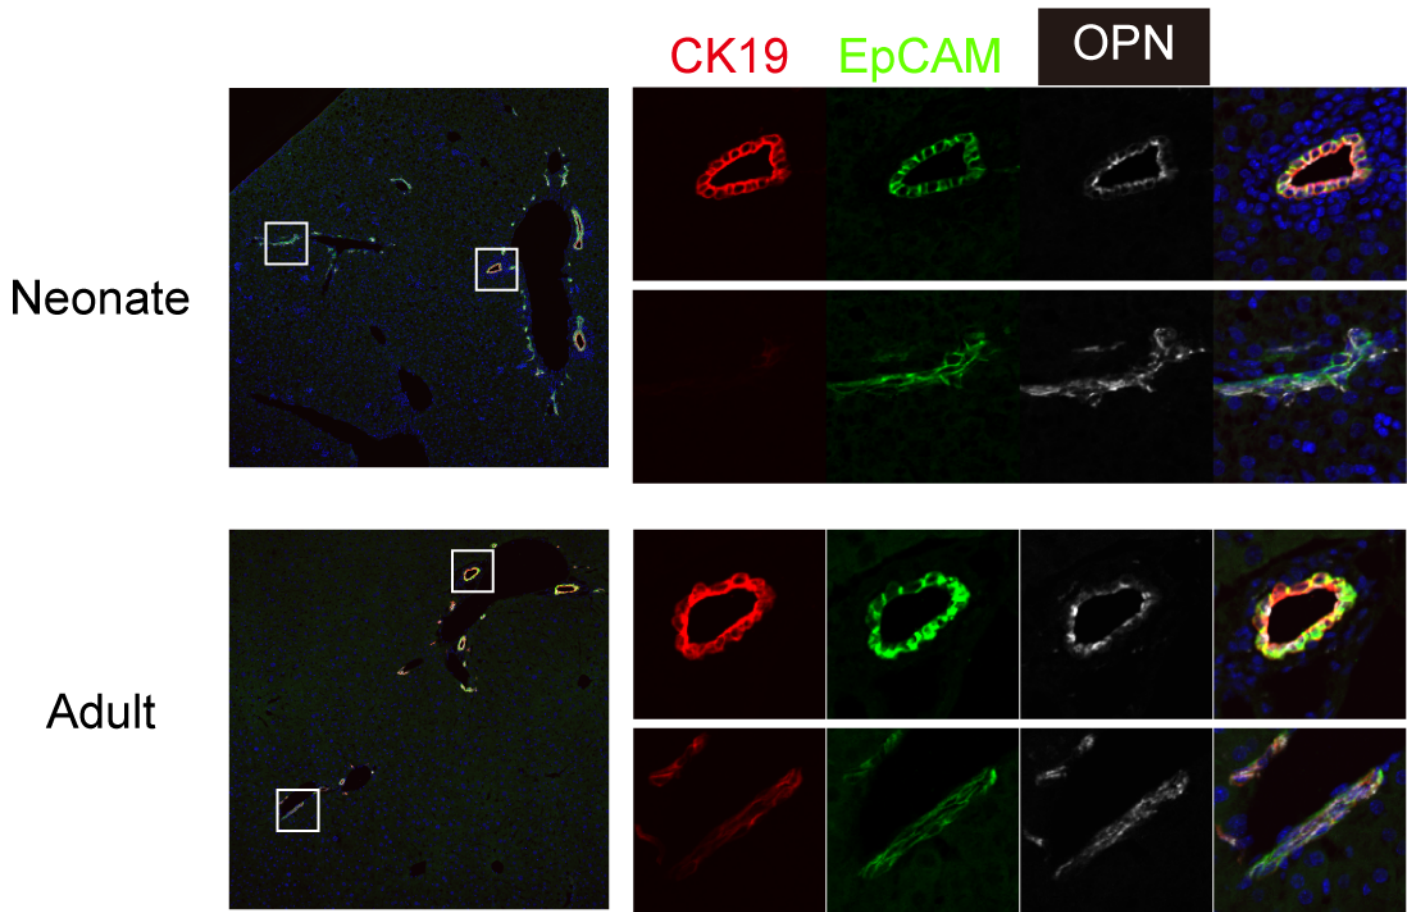

**Fig. S3. Neonatal small ductules in the periphery are negative for CK19.**



Fig. S4

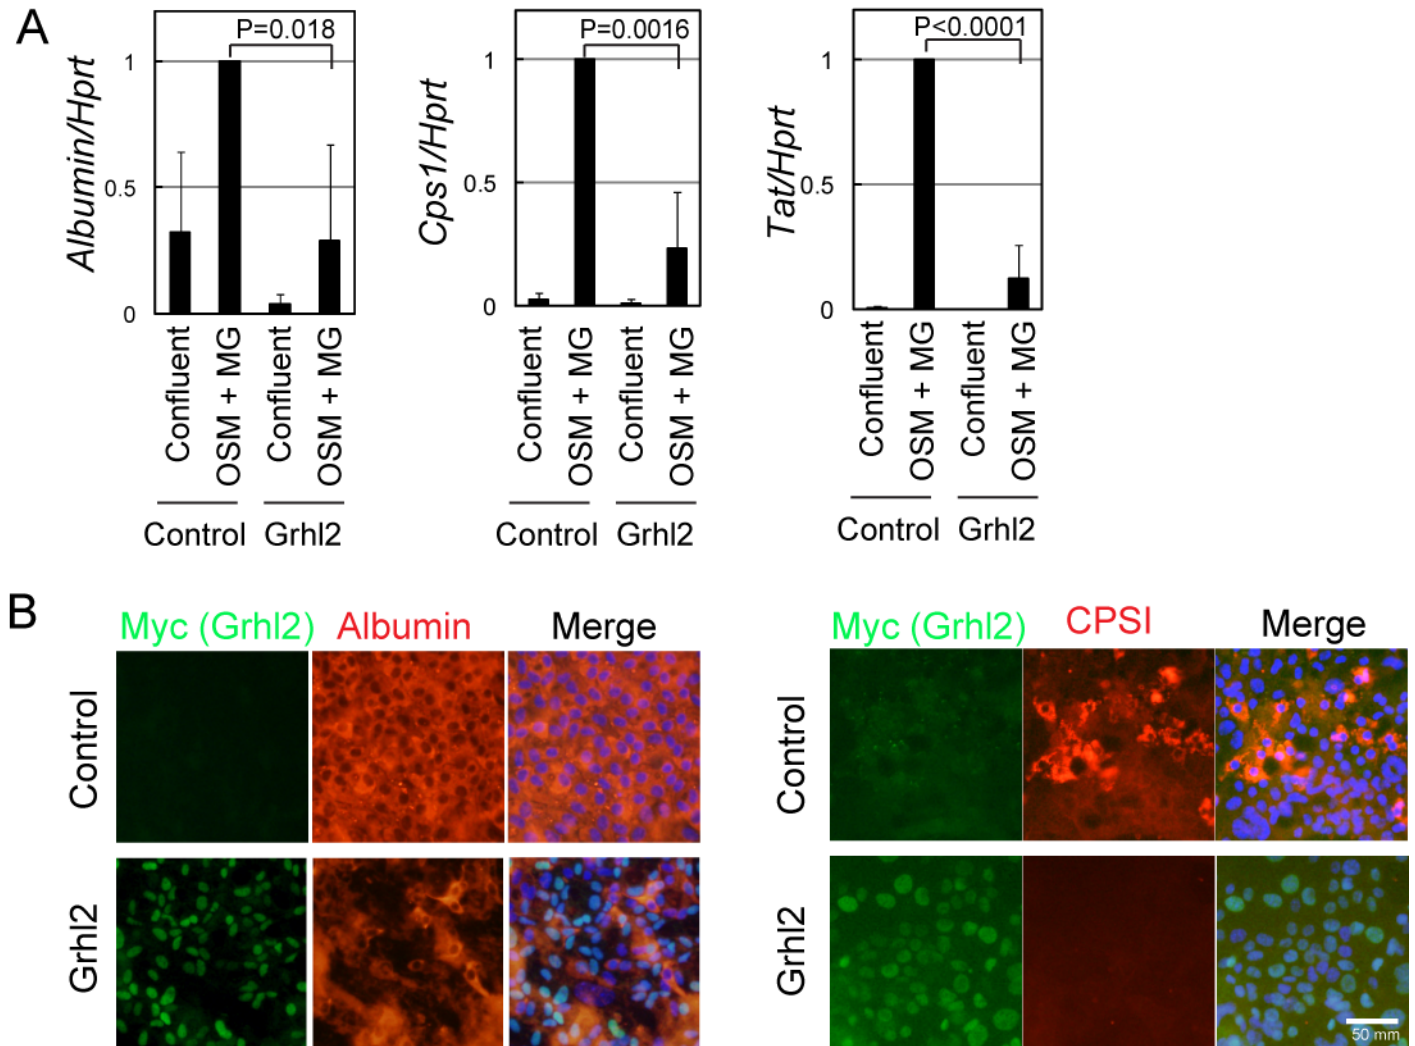

**Fig. S4. Grhl2 inhibits hepatocytic differentiation of liver progenitors.** HPPL, bipotential liver progenitor cell line, was introduced with Grhl2 by using a retrovirus vector. Hepatocytic differentiation was induced by oncostatin M (OSM) and Matrigel (MG). Grhl2 inhibits induction of *Albumin*, *Cps1*, and *Tat* (A) as well as ALBUMIN and CPSI (B). A bar represents 50  $\mu$ m.

Fig. S5.

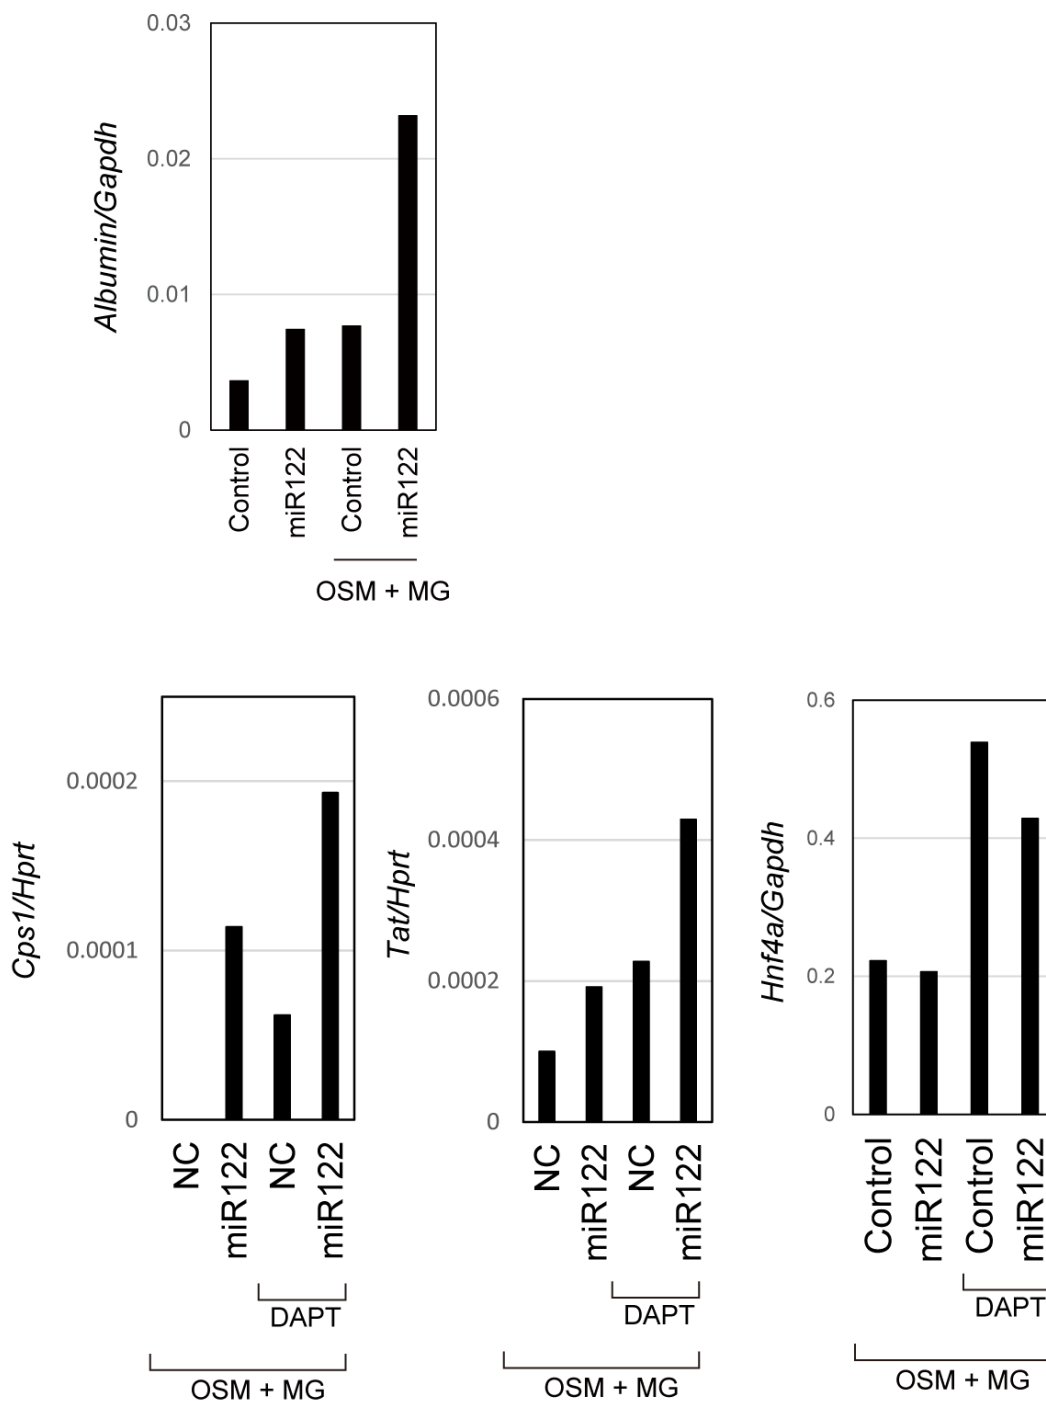

**Fig. S5. miR122 promotes hepatocytic differentiation of adult EpCAM<sup>+</sup> cells.** miR122 slightly upregulates hepatocyte markers. EpCAM<sup>+</sup> cells isolated from adult livers were cultured on gelatin coated dishes. They were transfected with miR122 and then treated with OSM and MG. For inducing *Cps1* and *Tat*, EpCAM<sup>+</sup> cells were also treated with DAPT, a  $\gamma$ -secretase inhibitor, and potential inhibitor of the Notch signaling pathway.

Fig. S6

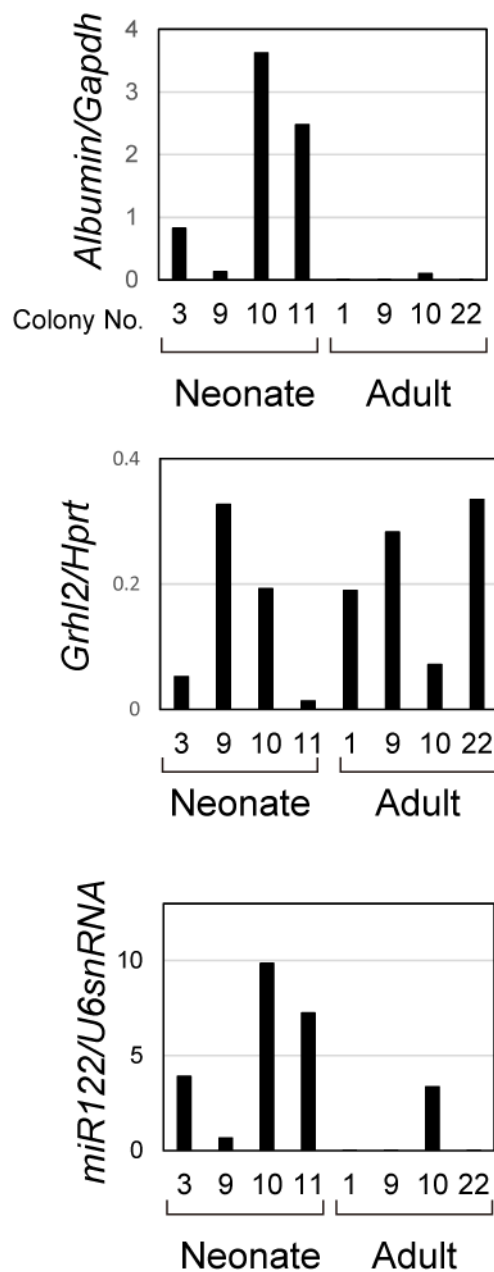

**Fig. S6. Expression of Albumin, Grhl2, and miR122 in colonies derived from neonatal and adult EpCAM<sup>+</sup> cells.**

**Table S1. Primary Antibodies**

| Antibody                             | Company                          | Cat. Number      | Host animal | Method | Dilution |
|--------------------------------------|----------------------------------|------------------|-------------|--------|----------|
| ALB                                  | Bethyl laboratory                | A90-234A         | goat        | IF     | 1:1000   |
| CD16/32                              | BD Pharmingen                    | 553141           | rat         | FACS   | 1:1000   |
| CD31                                 | Biologend                        | 102501           | rat         | IF     | 1:1000   |
| CD31<br>(APC-conjugated)             | BD Pharmingen                    | 551262           | rat         | FACS   | 1:1000   |
| CD45<br>(APC-conjugated)             | BD Pharmingen                    | 559864           | rat         | FACS   | 1:1000   |
| C/EBP $\alpha$                       | SantaCruz<br>Biotechnology Inc.  | sc-61            | rabbit      | IF     | 1:200    |
| CPSI                                 | Santa Cruz<br>Biotechnology Inc. | sc-10516         | goat        | IF     | 1:200    |
| Cytokeratin 19                       | Tanimizu et al. 2003             |                  | rabbit      | IF     | 1:2000   |
| EpCAM                                | BD Pharmingen                    | 552370           | rat         | IF     | 1:500    |
| EpCAM<br>(FITC or<br>APC-conjugated) | Biologend                        | 118208<br>118213 | rat         | FACS   | 1:1000   |
| GFP                                  | MBL                              | 598              | rabbit      | IF     | 1:1000   |
| GFP                                  | Nakarai Tesk                     | GF090R           | rat         | IF     | 1:1000   |
| GRHL2                                | Sigma-Aldrich                    | HPA004820        | rabbit      | IF     | 1:1000   |
| HNF1 $\beta$                         | SantaCruz<br>Biotechnology Inc.  | sc-22840         | rabbit      | IF     | 1:200    |
| HNF4 $\alpha$                        | SantaCruz<br>Biotechnology Inc.  | sc-8987          | rabbit      | IF     | 1:200    |
| HNF4 $\alpha$                        | SantaCruz<br>Biotechnology Inc.  | sc-6557          | goat        | IF     | 1:200    |
| Myc-tag                              | Millipore                        | 05-074           | mouse       | IF     | 1:1000   |
| Nidogen-1                            | Millipore                        | MAB1946          | rat         | IF     | 1:1000   |
| Osteopontin                          | R&D systems                      | AF808            | goat        | IF     | 1:600    |
| SOX9                                 | Millipore                        | AB5535           | rabbit      | IF     | 1:3000   |
| TER119<br>(APC/Cy7-conjugated)       | Biologend                        | 116223           | rat         | FACS   | 1:1000   |

**Table S2. Primers used for PCR**

| Gene name |           | Sequence                         |
|-----------|-----------|----------------------------------|
| Albumin   | Sense     | 5'-GAA AGC CCA CTG TCT TAG TG-3' |
|           | Antisense | 5'-GGG TGT AGC GAA CTA GAA TG-3' |
| Cyp1a2    | Sense     | 5'-CCCTGCCCTTCAGTGGTACA-3'       |
|           | Antisense | 5'-AAGCTGTAGAGGTCTGGTCG-3'       |
| Cyp2b10   | Sense     | 5'-GTTGAGCCAACCTTCAAGGAA-3'      |
|           | Antisense | 5'-AAGAGCTCAAACATCTGGCTG-3'      |
| Cyp2d10   | Sense     | 5'-GATCCCAAGGTGTGGTCCTT-3'       |
|           | Antisense | 5'-GCAGGAGTATGGGGAACATA-3'       |
| CPSI      | Sense     | 5'-ACT GAG AGA TGC TGA CCC TA-3' |
|           | Antisense | 5'-CCT GGA AAT TGG TGA GGA GA-3' |
| GAPDH     | Sense     | 5'-ACC ACA GTC CAT GCC ATC AC-3' |
|           | Antisense | 5'-TCC ACC ACC CTG TTG CTG TA-3' |
| G6pc      | Sense     | 5'-CCA ACG TAT GGA TTC CGG TG-3' |
|           | Antisense | 5'-TCC CAG GTT TTT GAA GAG GC-3' |
| GFP       | Sense     | 5'-CTGAAGTTCATCTGCACCAC-3'       |
|           | Antisense | 5'-TTGAAGTTCACCTTGATGCC-3'       |
| Pepck     | Sense     | TTGATGCCCAAGGCAACTTA             |
|           | Antisense | ACGGCCACCAAAGATGATAC             |
| TAT       | Sense     | 5'-GAG GAG TGT GAC AAA TAG GC-3' |
|           | Antisense | 5'-AGA GGA CAC TCC TGT GTC AG-3' |
| Tdo2      | Sense     | 5'-TGAGTAAAGGTGAACGACGAC-3'      |
|           | Antisense | 5'-AGCCGACTGAGAATCCTGTA-3'       |

**Table S3.**

[Click here to Download Table S3](#)
